# Supplementary material
Source: publisher figshare collection journal article supplement (https://acs.figshare.com/ndownloader/files/13440410)
Supplement: Supplementary file 1 [file 13440410]

## **Supporting Information for:**

### **Investigating fluorescent organic matter composition as a key predictor for arsenic mobility in groundwater aquifers**

Anna-Ricarda Schittich <sup>a,\*</sup>, Urban J. Wünsch <sup>b,c</sup>, Harshad V. Kulkarni <sup>d</sup>, Maria Battistel<sup>a</sup>, Henrik Bregnhøj <sup>e</sup>, Colin A. Stedmon <sup>e</sup>, Ursula S. McKnight <sup>a</sup>

<sup>a</sup> *Department of Environmental Engineering, Technical University of Denmark, Bygningstorvet, Building 115, 2800 Kgs. Lyngby, Denmark*

<sup>b</sup> *Water Environment Technology, Chalmers University of Technology, Architecture and Civil Engineering, Sven Hultins Gata 6, 41296 Gothenburg, Sweden*

<sup>c</sup> *National Institute of Aquatic Resources, Technical University of Denmark, Kemitorvet, Building 202, 2800 Kgs. Lyngby, Denmark*

<sup>d</sup> *Department of Geology, Kansas State University, Manhattan, KS, USA, 66502*

<sup>e</sup> *School of Global Health, University of Copenhagen, 1353 Copenhagen K, Denmark*

\* To whom the correspondence should be addressed: Email: annsc@env.dtu.dk

The authors declare no conflict of interest.

The supporting material contains 24 pages, 11 figures and 3 tables.

## Summary of SI contents

|                                                   |           |
|---------------------------------------------------|-----------|
| <b>S1 Supplementary Methods .....</b>             | <b>3</b>  |
| Investigation Strategy and Sampling .....         | 3         |
| Batch experiments.....                            | 3         |
| HPSEC-EEM spectroscopy .....                      | 4         |
| <b>S2 Supplementary Figures .....</b>             | <b>5</b>  |
| Mapping plan (ArcGIS maps).....                   | 5         |
| One-Sample Approach, sum of squared error.....    | 7         |
| Bulk PARAFAC Model.....                           | 8         |
| Bulk EEMs.....                                    | 9         |
| Chromatograms.....                                | 13        |
| Batch experiments.....                            | 15        |
| <b>S3 Supplementary Tables.....</b>               | <b>17</b> |
| Groundwater and fluorescence characteristics..... | 17        |
| Position of peak maxima.....                      | 22        |
| <b>Supplementary References.....</b>              | <b>24</b> |

## **S1 Supplementary Methods**

### **Investigation Strategy and Sampling**

Preliminary maps were created based on inverse distance weighting (IDW) to estimate areas of unknown As concentrations based on a linearly weighted combination of a set of points with a known concentration. The weight is a function of inverse distance, i.e. the influence of a known point decreases with distance to the unknown cell value.<sup>1</sup> With the help of IDW interpolation, the As contamination level could be estimated for unknown areas based on punctual, known tube-well measurements. Based on this overview of the As distribution, additional As measurements were taken in the field with a portable field device (Palintest Arsenator, Wagtech) that delivers an immediate estimation of the level of As contamination.<sup>2</sup> The purpose of taking new measurements was to extend the dataset and to verify and modify the initial distribution maps. Based on the modified distribution maps, 50 locations were chosen from which samples for laboratory analysis in Denmark were collected (S2 Fig. S2).

IDW maps were created for several depth levels for the shallow aquifer, including [10; 17], [19 ; 25] and [29 ; 33] mbgs, respectively (S2 Fig. S2). These depth levels are expected to represent local sub-aquifers, separated by thin clay layers. Due to uncertain depth information and due to the fact that the sub-aquifers are assumed to be hydrologically interconnected, the study will address the shallow aquifer as one unit.

### **Batch experiments**

To investigate a possible interference from the high As concentrations (i.e. quenching effects) on the fluorescence measurements, the As concentration was stepwise raised to 800 µg/L after

the initial measurement for one sample and the change of fluorescence signal with changing As concentration was analysed. In a second experiment, the As concentration of the same sample was immediately raised to 800 µg/L and the change of fluorescence signal was analysed over three weeks.

### **HPSEC-EEM spectroscopy**

For each of the seven samples analysed with HPSEC-EEM spectroscopy, a sequence of 35 chromatographic runs was performed, whereby instrument parameters were systematically changed for each of the 35 injections to allow the determination of absorbance properties (one run) and fluorescence properties at each excitation wavelength (34 runs). For each sample, this resulted in 1534 individual absorbance spectra and 1534 fluorescence emission scans at each excitation wavelength. The 1534 fluorescence emission scans for each excitation wavelength were then combined to form EEMs, resulting in 1534 chromatographically separated EEMs per sample.



## S2 Supplementary Figures

### Mapping plan (ArcGIS maps)

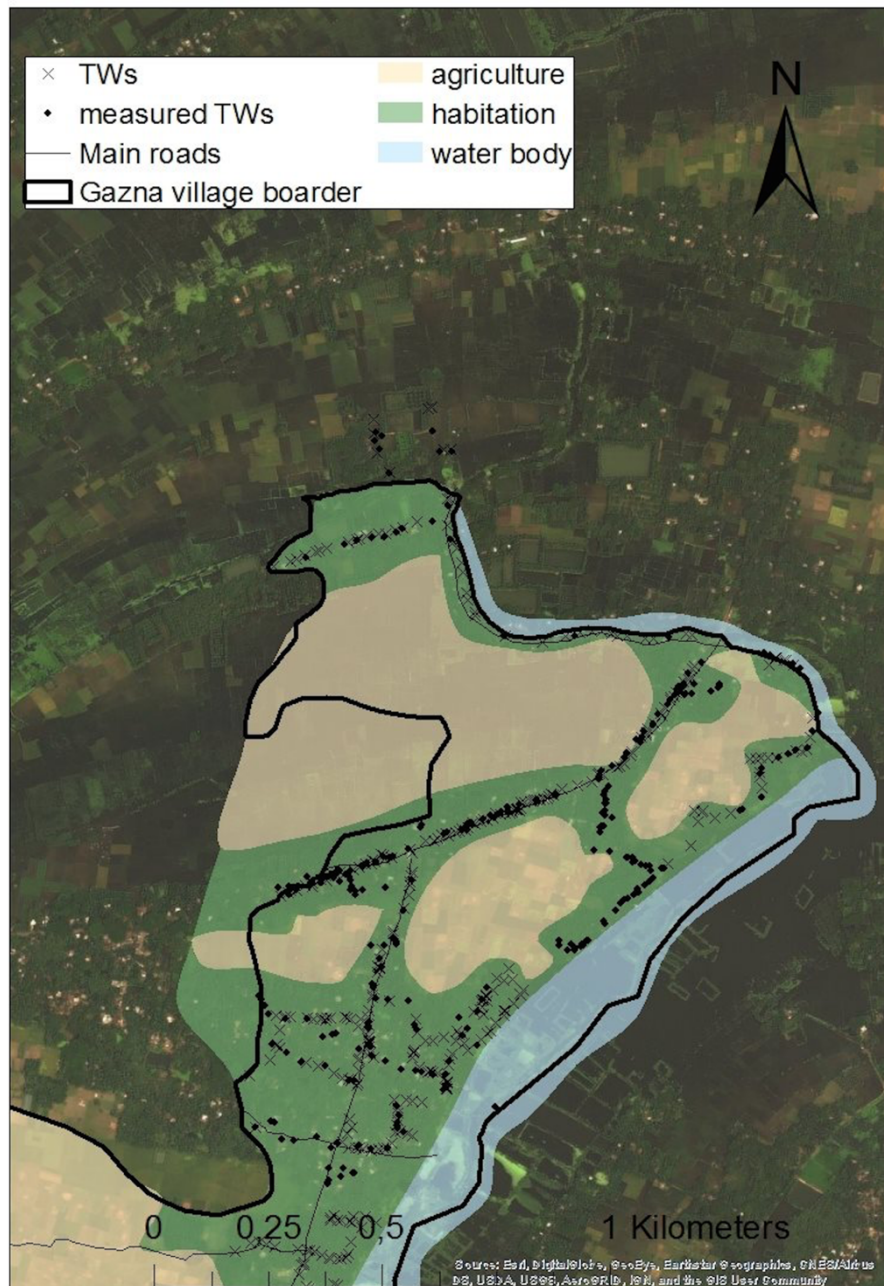

**Figure S1:** Overview for the registered household tube-wells in Gazna village before the field campaign in April 2017. (No registration of irrigation tube wells)

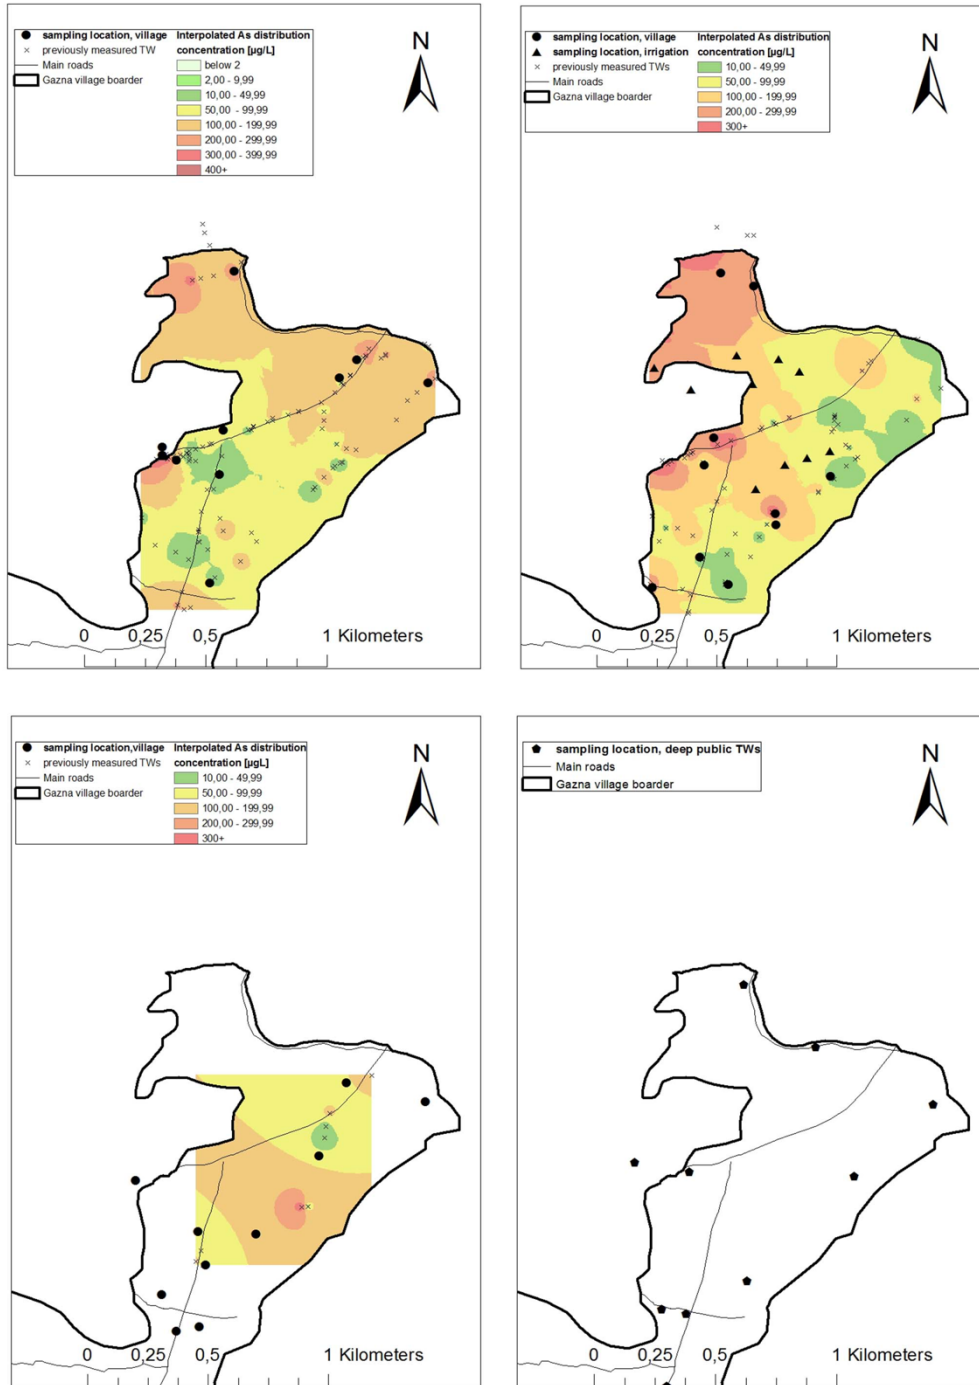

**Figure S2:** Preliminary maps and sampling locations for the shallow aquifer at 10-17 mbgs (top, left), 19-25 mbgs (top, right), 29-33 mbgs (bottom, left) and for the deep aquifer (bottom, right). **Circles** indicate sampling locations for household tube-wells. **Triangles** indicate sampling locations for irrigation tube-wells. **Pentagons** indicate sampling location for deep public tube-wells.

## One-Sample Approach, sum of squared error

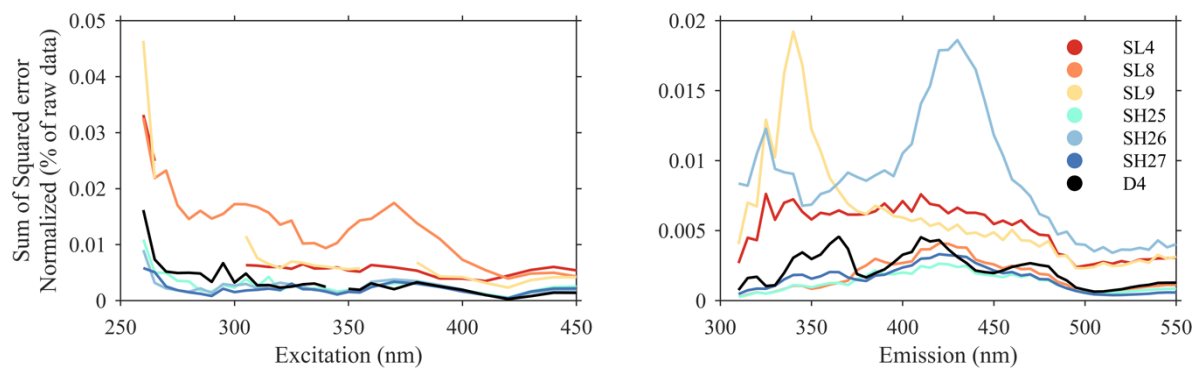

**Figure S3:** Sum of squared error between the final ‘one-sample’ model and the seven individual models for excitation (left) and emission curves (right).

## Bulk PARAFAC Model

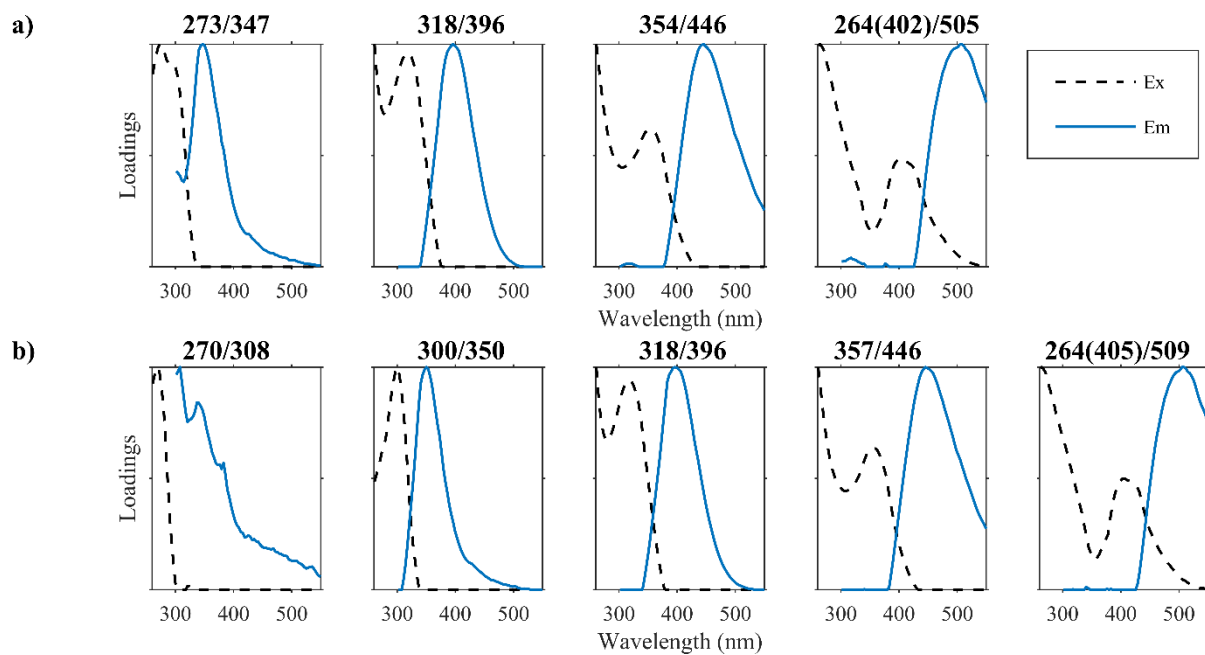

**Figure S4:** Four (a) and five (b) component bulk PARAFAC model. Excitation curves shown as dashed lines and emission curves shown as solid lines. Location of excitation (Ex) and emission (Em) peaks are indicated as Ex/Em in [nm].

## Bulk EEMs

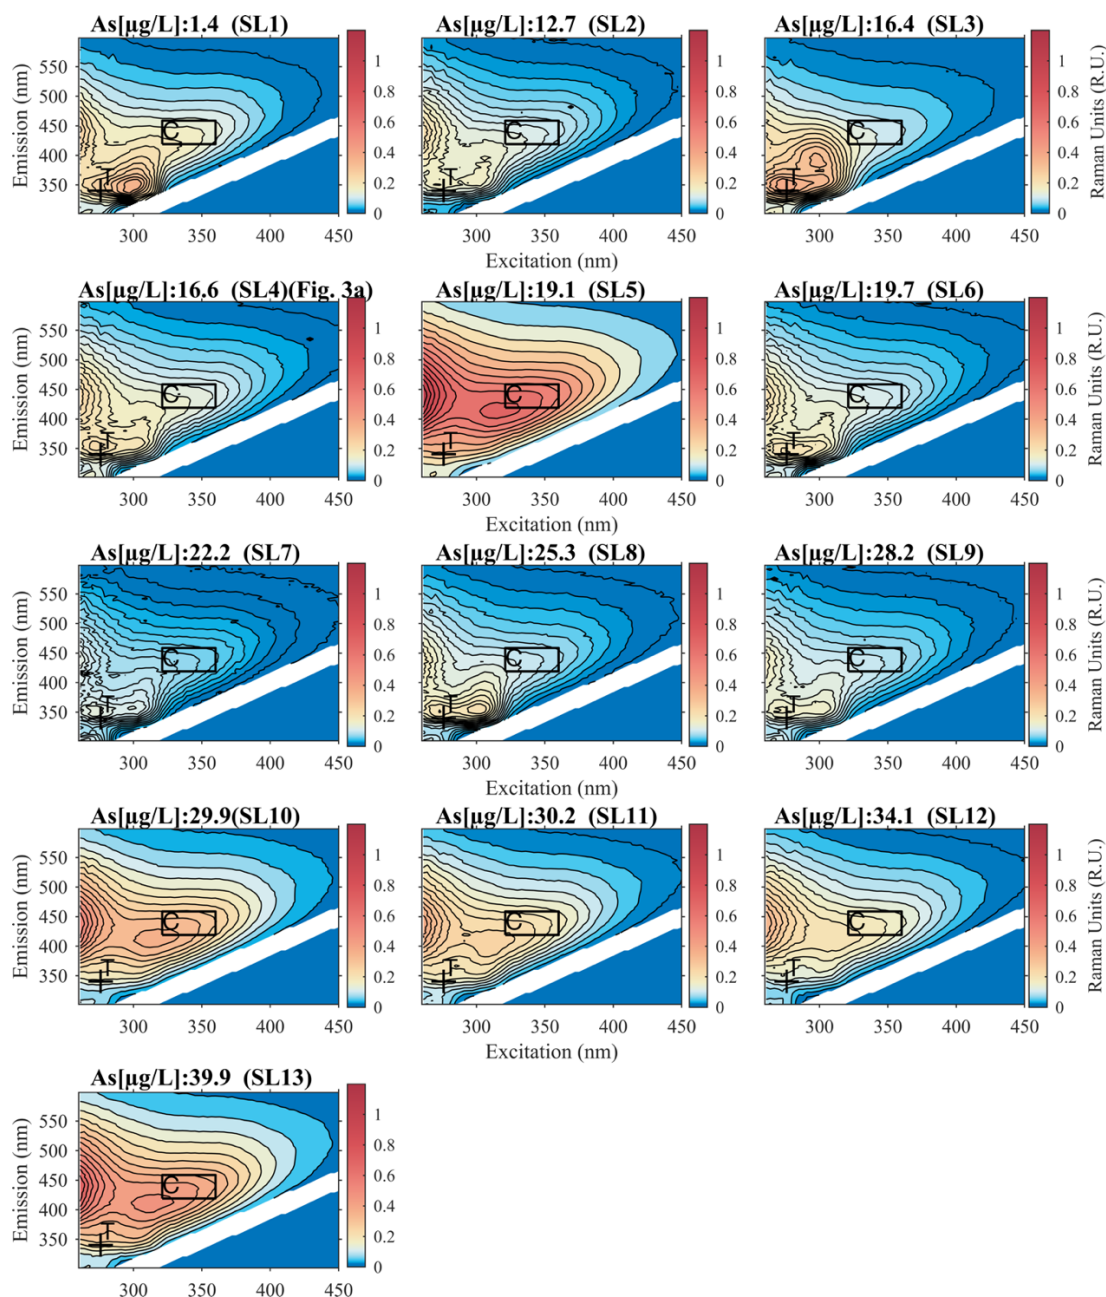

**Figure S5:** Bulk EEMs for all 13 SL samples, sorted by increasing As concentration.

The samples SL4, SL8 and SL9 were additionally analyzed by HPSEC; see chromatograms in S2 Fig. S8a-c. The bulk EEM of SL4 is also shown in the main manuscript in Fig. 3a.



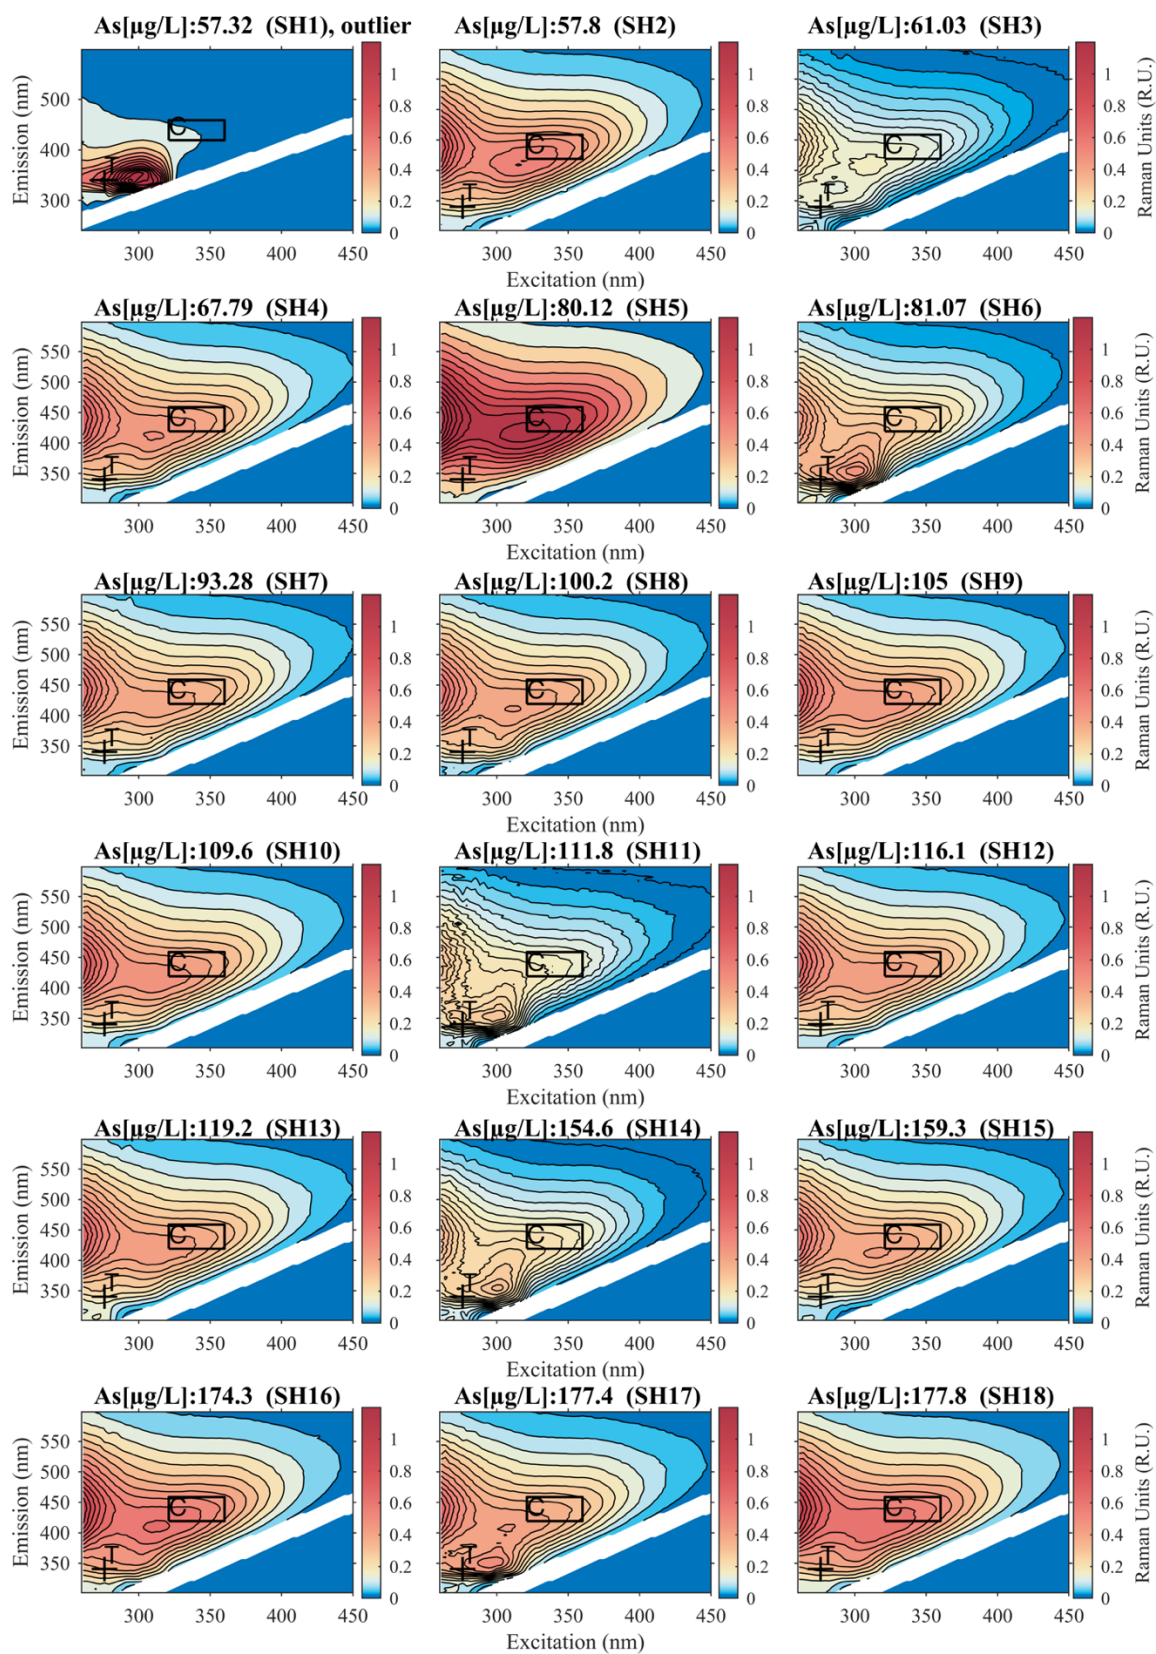

**Figure S6a:** Bulk EEMs of SH samples (SH1-SH18), sorted by increasing As concentration.

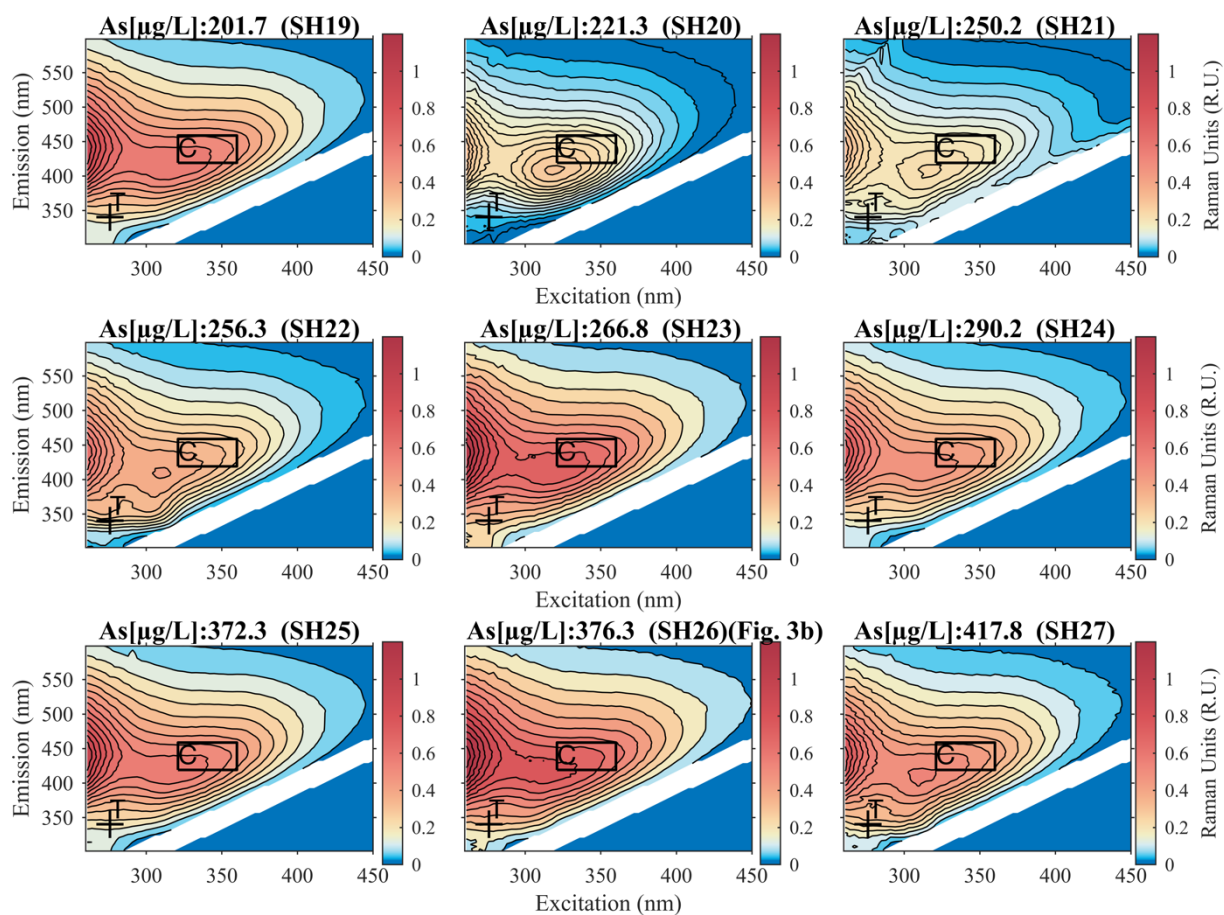

**Figure S6b:** Bulk EEMs of SH samples (SH19-SH27), sorted by increasing As concentration.

The samples SH25, SH26 and SH27 were additionally analyzed by HPSEC; see chromatograms in S2 Fig. S8d-f. The bulk EEM of SH26 is also shown in the main manuscript in Fig. 3b.

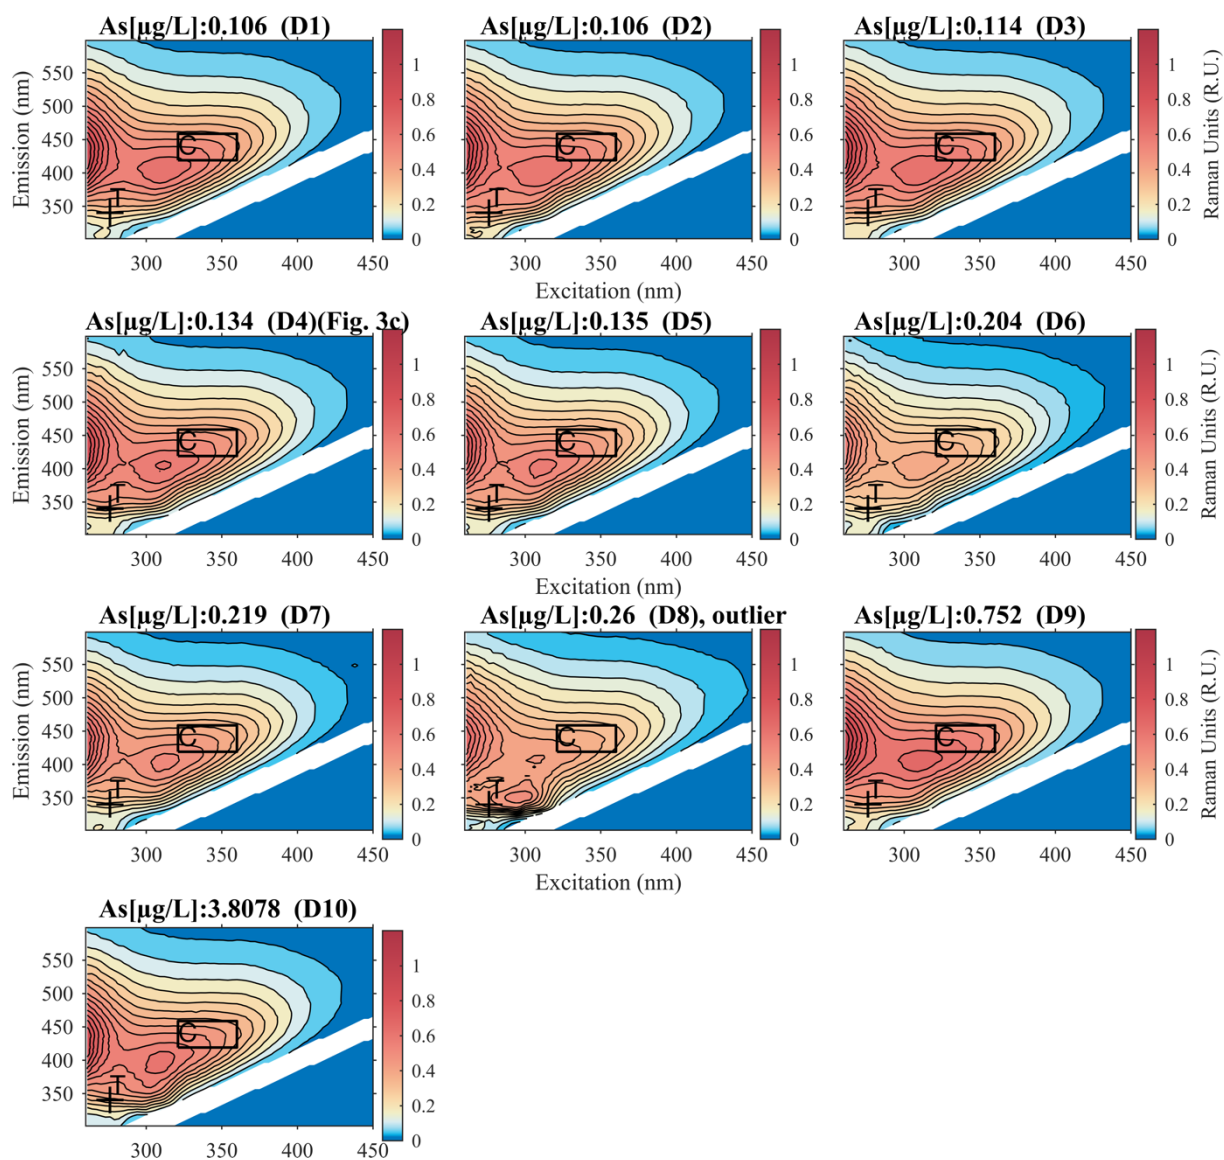

**Figure S7:** Bulk EEMs of all 10 D samples. (Note, detection limit of As is 1 µg/L).

The sample D4 was additionally analyzed by HPSEC; see chromatograms in S2 Fig. S8g. The bulk EEM of D4 is also shown in the main manuscript in Fig. 3c.



## Chromatograms

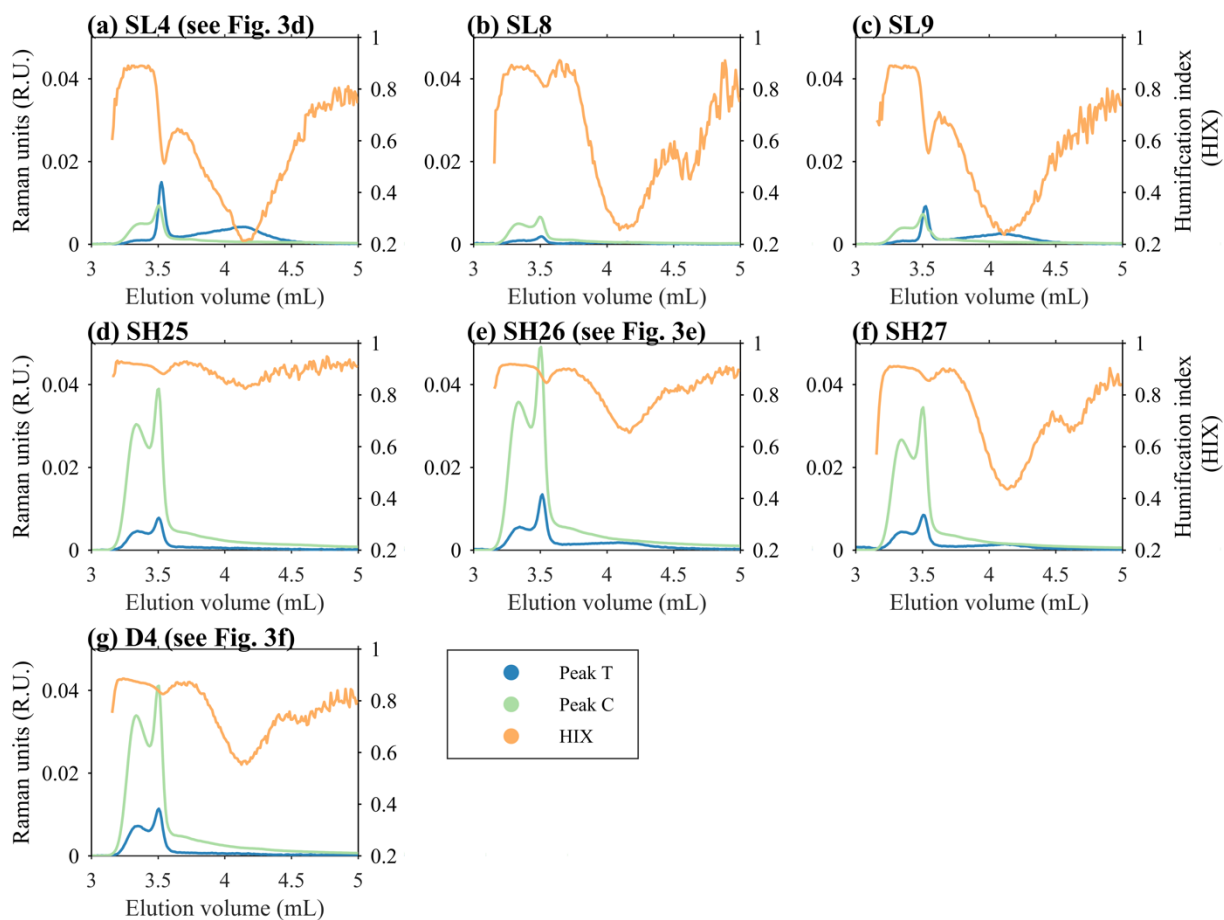

**Figure S8:** Chromatograms of peak T, peak C and HIX for the seven samples which were analyzed with HPSEC.

The chromatograms of SL4, SH26 and D4 are also shown in the main manuscript in Fig. 3d-f.

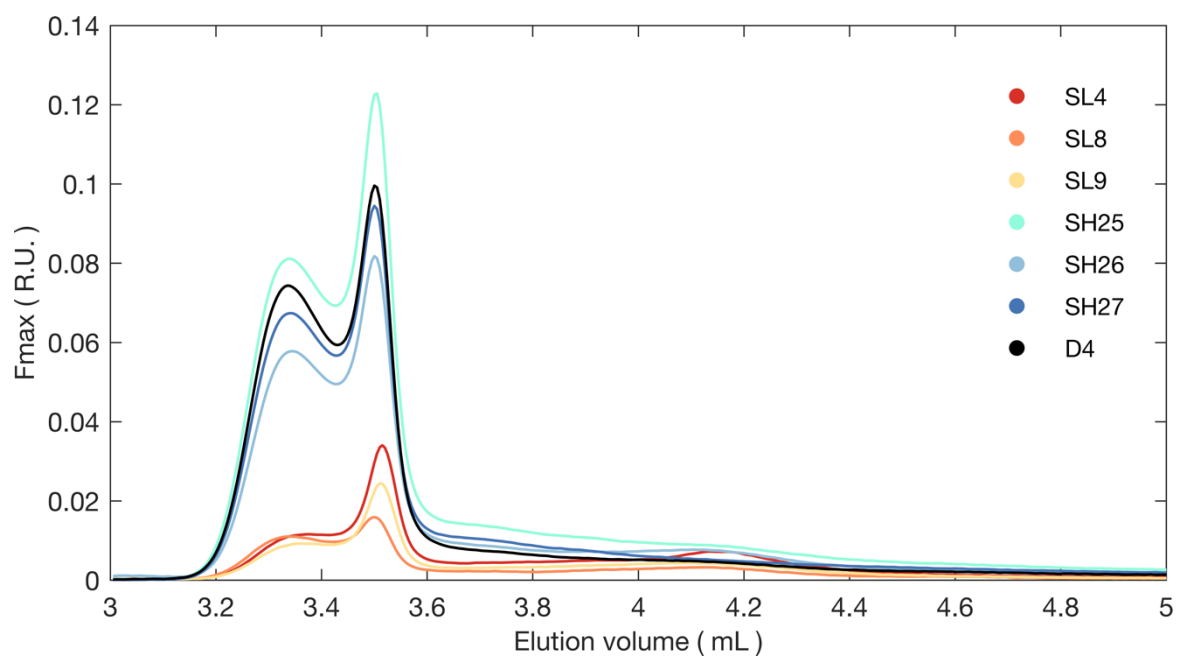

**Figure S9:** Chromatograms showing bulk fluorescence for the seven samples analyzed with HPSEC.

## Batch experiments

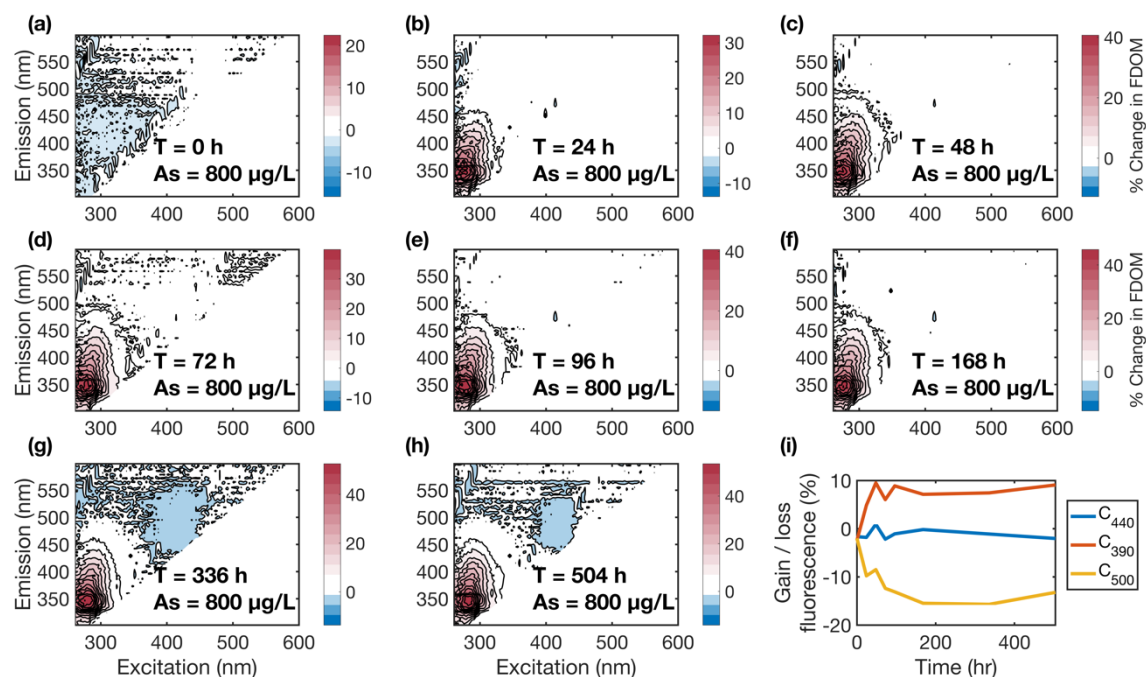

**Figure S10:** Change of FDOM (%) of sample SL6 over time at an As concentration of 800 µg/L (normalized subtraction EEMs) (a-h) and corresponding change of fluorescence (%) of PARAFAC components C<sub>390</sub>, C<sub>440</sub>, C<sub>500</sub> (i). The increase in peak T, when measuring the fluorescence signal over time, most likely indicates impurities in the prepared As solution. A loss of fluorescence signal, as would be expected from quenching effects, could not be observed.

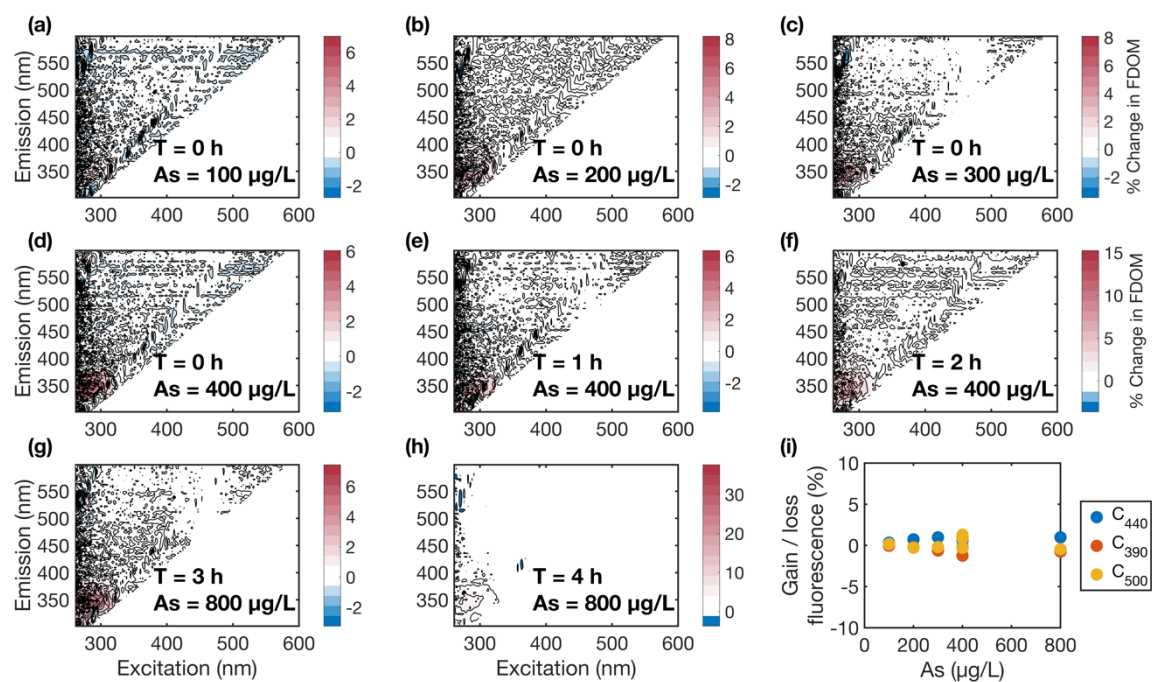

**Figure S11:** Change of FDOM (%) of sample SL6 for increasing As concentration (normalized subtraction EEMs) (a-h) and corresponding change of fluorescence (%) of PARAFAC components  $C_{390}$ ,  $C_{440}$ ,  $C_{500}$  (i).

## S3 Supplementary Tables

### Groundwater and fluorescence characteristics

**Table S1:** Groundwater and fluorescence characteristics of the shallow (SL; SH) and the deep aquifer (D). All numbers are expressed as mean value  $\pm$  standard deviation, with minimum - maximum range in parentheses

|                        | Shallow Aquifer         |                         | <sup>a</sup> Deep Aquifer |
|------------------------|-------------------------|-------------------------|---------------------------|
|                        | (SL)                    | (SH)                    | (D)                       |
| Depth [mbgs]           | [10-33]                 | [10-33]                 | [170-200]                 |
| As conc. level         | <50 [ $\mu\text{g/L}$ ] | >50 [ $\mu\text{g/L}$ ] | <10 [ $\mu\text{g/L}$ ]   |
| n samples              | 13                      | 27                      | 10                        |
| <b>Water Chemistry</b> |                         |                         |                           |
| As [ $\mu\text{g/L}$ ] | 23 $\pm$ 10             | 172 $\pm$ 101           | <1                        |
|                        | (1 - 40)                | (57 - 418)              | (<1 - 4)                  |
| Fe [mg/L]              | 2.62 $\pm$ 2.56         | 4.68 $\pm$ 3.44         | 0.58 $\pm$ 0.20           |
|                        | (0.09 - 9.14)           | (0.06 - 13.51)          | (0.21 - 0.96)             |
| Mn [mg/L]              | 0.24 $\pm$ 0.07         | 0.43 $\pm$ 0.20         | 0.08 $\pm$ 0.01           |
|                        | (0.14 - 0.34)           | (0.09- 0.88)            | (0.06 - 0.097)            |
| P [mg/L]               | 0.40 $\pm$ 0.41         | 0.62 $\pm$ 0.29         | 0.03 $\pm$ 0.001          |

|                                           |               |               |               |
|-------------------------------------------|---------------|---------------|---------------|
|                                           | (0.02-1.25)   | (0.07-1.16)   | (0.02-0.04)   |
| DOC[mg/L]                                 | 1.43 ± 0.51   | 1.76 ± 0.58   | 1.88 ± 0.72   |
|                                           | (0.64 - 2.28) | (0.80 - 2.89) | (1.05 - 3.39) |
| <b>Spectroscopic Properties</b>           |               |               |               |
| (based on bulk analysis)                  |               |               |               |
| <sup>b</sup> SUVA <sub>254</sub> [L/mg m] | 1.85±1.52     | 2.53±1.45     | 2.31±0.70     |
|                                           | (0.82-6.84)   | (0.82-5.44)   | (0.92-3.36)   |
| <sup>b, c</sup> HIX                       | 0.72 ± 0.09   | 0.83 ± 0.05   | 0.79 ± 0.06   |
|                                           | (0.56 – 0.84) | (0.70 – 0.89) | (0.64 – 0.84) |

<sup>a</sup> Most samples from the deep aquifer show dissolved As concentrations below the detection limit of 1 µg/L.

<sup>b</sup> Values given for SUVA<sub>254</sub> and HIX do not include sample SH1 due to sample contamination, see Fig. S6a.

<sup>c</sup> Note, that the HIX shown in this table is calculated based on Ohno et al.; <sup>3</sup> the conventional HIX based on Zsolnay et al. <sup>4</sup> resulted in values of 1.27-5.40, 2.37-7.92 and 1.78-5.11 for SL, SH and D samples, respectively, which might be relevant for comparison with other studies.

**Table S2:** Groundwater and fluorescence characteristics of all 50 samples.

| <b>Index</b> | <b>Depth</b> | <b>As</b> | <b>Fe</b> | <b>Mn</b> | <b>P</b> | <sup>a</sup> <b>DOC</b> | <b>SUVA<sub>254</sub></b> | <sup>b</sup> <b>HIX</b> |
|--------------|--------------|-----------|-----------|-----------|----------|-------------------------|---------------------------|-------------------------|
|              |              | [mbgs]    | [µg/L]    | [mg/L]    | [mg/L]   | [mg/L]                  | [L/mg m]                  |                         |
| D1           | 183          | <1        | 0.96      | 0.09      | 0.02     | 1.96                    | 1.98                      | 0.84                    |
| D2           | 183          | <1        | 0.70      | 0.10      | 0.03     | 2.64                    | 1.84                      | 0.73                    |
| D3           | 198          | <1        | 0.44      | 0.07      | 0.04     | 2.00                    | 2.04                      | 0.77                    |
| D4           | 174          | <1        | 0.67      | 0.07      | 0.03     | 1.91                    | 2.25                      | 0.82                    |
| D5           | 183          | <1        | 0.64      | 0.07      | 0.04     | 1.08                    | 3.33                      | 0.81                    |
| D6           | 183          | <1        | 0.46      | 0.06      | 0.03     | 3.39                    | 0.92                      | 0.80                    |
| D7           | 183          | <1        | 0.42      | 0.07      | 0.02     | 1.05                    | 3.36                      | 0.81                    |
| D8           | 183          | <1        | 0.59      | 0.06      | 0.04     | 1.65                    | 2.14                      | 0.64                    |
| D9           | 183          | <1        | 0.77      | 0.09      | 0.04     | –                       | 2.30                      | 0.82                    |
| D10          | 183          | 4         | 0.21      | 0.09      | 0.02     | 1.25                    | 2.89                      | 0.82                    |
| SL1          | 15           | <1        | 0.22      | 0.14      | 0.02     | 1.73                    | 1.21                      | 0.68                    |
| SL2          | 21           | 13        | 0.72      | 0.17      | 0.08     | 1.77                    | 0.90                      | 0.75                    |
| SL3          | 21           | 16        | 2.80      | 0.29      | 0.03     | –                       | 2.58                      | 0.56                    |
| SL4          | 30           | 17        | 1.99      | 0.28      | 0.15     | 1.77                    | 1.13                      | 0.69                    |
| SL5          | 27           | 19        | 4.70      | 0.27      | 0.62     | 0.92                    | 6.84                      | 0.84                    |
| SL6          | 21           | 20        | 1.15      | 0.19      | 0.14     | 0.64                    | 2.07                      | 0.64                    |

|      |    |     |       |      |      |      |      |      |
|------|----|-----|-------|------|------|------|------|------|
| SL7  | 21 | 22  | 0.23  | 0.20 | 0.10 | 1.16 | 0.82 | 0.61 |
| SL8  | 16 | 25  | 0.09  | 0.21 | 0.12 | 1.19 | 1.07 | 0.67 |
| SL9  | 24 | 28  | 0.95  | 0.22 | 0.13 | 1.06 | 1.14 | 0.65 |
| SL10 | 23 | 30  | 2.30  | 0.38 | 0.89 | 2.17 | 1.54 | 0.83 |
| SL11 | 30 | 30  | 9.14  | 0.28 | 0.89 | 1.62 | 1.37 | 0.78 |
| SL12 | 26 | 34  | 5.58  | 0.19 | 0.79 | 0.88 | 1.85 | 0.80 |
| SL13 | 17 | 40  | 4.23  | 0.35 | 1.25 | 2.28 | 1.58 | 0.84 |
| SH1  | 10 | 57  | 10.99 | 0.74 | 0.74 | 1.03 | 1.79 | 0.35 |
| SH2  | 33 | 58  | 6.62  | 0.32 | 0.98 | 2.89 | 1.85 | 0.86 |
| SH3  | 24 | 61  | 1.72  | 0.22 | 0.15 | 1.46 | 0.82 | 0.73 |
| SH4  | 18 | 68  | 0.06  | 0.34 | 0.39 | 2.32 | 1.83 | 0.85 |
| SH5  | 21 | 80  | 10.42 | 0.53 | 0.43 | 2.35 | 4.88 | 0.89 |
| SH6  | 15 | 81  | 2.51  | 0.39 | 0.19 | 1.85 | 1.32 | 0.74 |
| SH7  | 29 | 93  | 2.55  | 0.09 | 0.61 | 0.81 | 4.74 | 0.86 |
| SH8  | 28 | 100 | 4.48  | 0.31 | 0.76 | 2.08 | 1.59 | 0.85 |
| SH9  | 30 | 105 | 5.43  | 0.24 | 1.16 | 1.64 | 2.12 | 0.84 |
| SH10 | 21 | 110 | 2.21  | 0.38 | 0.69 | 2.35 | 1.59 | 0.85 |
| SH11 | 30 | 112 | 2.61  | 0.43 | 0.74 | 1.64 | 1.07 | 0.70 |
| SH12 | 15 | 116 | 5.37  | 0.18 | 0.69 | 1.65 | 2.06 | 0.83 |



|      |    |     |       |      |      |      |      |      |
|------|----|-----|-------|------|------|------|------|------|
| SH13 | 30 | 119 | 4.79  | 0.37 | 1.04 | 1.93 | 1.65 | 0.85 |
| SH14 | 15 | 155 | 0.22  | 0.57 | 0.12 | 1.66 | 1.42 | 0.74 |
| SH15 | 24 | 159 | 4.23  | 0.59 | 0.67 | 1.83 | 1.78 | 0.85 |
| SH16 | 16 | 174 | 2.10  | 0.38 | 0.29 | 2.67 | 2.36 | 0.84 |
| SH17 | 24 | 177 | 7.08  | 0.58 | 0.96 | 1.24 | 2.33 | 0.77 |
| SH18 | 15 | 178 | 10.04 | 0.28 | 0.89 | 0.87 | 5.44 | 0.84 |
| SH19 | 26 | 202 | 3.45  | 0.46 | 0.61 | 2.63 | 1.65 | 0.87 |
| SH20 | 18 | 221 | 0.25  | 0.15 | 0.07 | 1.05 | 2.33 | 0.89 |
| SH21 | 22 | 250 | 6.74  | 0.80 | 0.54 | 2.15 | 1.60 | 0.81 |
| SH22 | 26 | 256 | 1.89  | 0.83 | 0.70 | 1.63 | 1.80 | 0.83 |
| SH23 | 18 | 267 | 13.51 | 0.51 | 0.72 | 1.86 | 5.01 | 0.81 |
| SH24 | 24 | 290 | 3.37  | 0.33 | 0.78 | 2.13 | 1.70 | 0.87 |
| SH25 | 18 | 372 | 7.63  | 0.44 | 0.74 | 0.80 | 5.25 | 0.87 |
| SH26 | 33 | 376 | 4.20  | 0.25 | 1.02 | 1.01 | 5.20 | 0.88 |
| SH27 | 15 | 418 | 1.80  | 0.88 | 0.54 | 1.99 | 2.48 | 0.84 |

<sup>a</sup> For two samples DOC could not be measured due to damage of the sampling bottles, indicated by –.

<sup>b</sup> Calculated according to Ohno et al. <sup>3</sup>

## Position of peak maxima

**Table S3:** Chromatographic positions of peak maxima (peak T, peak C)

|             |                          | Peak T  |        |        | Peak C  |        |
|-------------|--------------------------|---------|--------|--------|---------|--------|
|             |                          | Max. 1  | Max. 2 | Max. 3 | Max. 1  | Max. 2 |
| <b>SL4</b>  | <i>Elution Vol. [ml]</i> | 3.38    | 3.53   | 4.13   | 3.37    | 3.50   |
|             | <i>Mol. Size [Da]</i>    | 1647.00 | 545.96 | 6.12   | 1772.80 | 632.56 |
|             | <i>Intensity [R.U.]</i>  | 0.001   | 0.015  | 0.004  | 0.005   | 0.009  |
| <b>SL8</b>  | <i>Elution Vol. [ml]</i> | 3.38    | 3.50   | 4.16   | 3.34    | 3.50   |
|             | <i>Mol. Size [Da]</i>    | 1647.00 | 632.56 | 5.29   | 2210.89 | 680.88 |
|             | <i>Intensity [R.U.]</i>  | 0.001   | 0.002  | 0.000  | 0.005   | 0.007  |
| <b>SL9</b>  | <i>Elution Vol. [ml]</i> | 3.35    | 3.53   | 4.07   | 3.37    | 3.50   |
|             | <i>Mol. Size [Da]</i>    | 1908.25 | 545.96 | 9.53   | 1772.80 | 632.56 |
|             | <i>Intensity [R.U.]</i>  | 0.001   | 0.009  | 0.003  | 0.004   | 0.007  |
| <b>SH25</b> | <i>Elution Vol. [ml]</i> | 3.35    | 3.50   | 3.80   | 3.34    | 3.50   |
|             | <i>Mol. Size [Da]</i>    | 2054.00 | 632.56 | 69.51  | 2210.89 | 632.56 |
|             | <i>Intensity [R.U.]</i>  | 0.005   | 0.008  | 0.001  | 0.030   | 0.039  |

|             |                            |              |              |              |              |              |
|-------------|----------------------------|--------------|--------------|--------------|--------------|--------------|
|             | <i>Elution Vol. [ml]</i>   | 3.35         | 3.52         | 4.09         | 3.34         | 3.50         |
| <b>SH26</b> | <i>Mol. Size [Da]</i>      | 2054.00      | 587.66       | 8.85         | 2210.89      | 632.56       |
|             | <i>Intensity [R.U.]</i>    | 0.006        | 0.013        | 0.002        | 0.036        | 0.049        |
|             | <i>Elution Vol. [ml]</i>   | 3.35         | 3.50         | 4.12         | 3.35         | 3.50         |
| <b>SH27</b> | <i>Mol. Size [Da]</i>      | 2054.00      | 632.56       | 7.10         | 2054.00      | 632.56       |
|             | <i>Intensity [R.U.]</i>    | 0.004        | 0.008        | 0.001        | 0.027        | 0.034        |
|             | <i>Elution Vol. [ml]</i>   | 3.35         | 3.50         | 3.91         | 3.34         | 3.50         |
| <b>D4</b>   | <i>Mol. Size [Da]</i>      | 2054.00      | 632.56       | 33.29        | 2210.89      | 632.56       |
|             | <i>Intensity [R.U.]</i>    | 0.007        | 0.011        | 0.001        | 0.034        | 0.041        |
| <hr/>       |                            |              |              |              |              |              |
|             | <i>mean E. Vol [ml]</i>    | <b>3.4</b>   | <b>3.5</b>   | <b>4.0</b>   | <b>3.3</b>   | <b>3.5</b>   |
|             | <i>mean Mol. Size [Da]</i> | <b>2E+03</b> | <b>6E+02</b> | <b>2E+01</b> | <b>2E+03</b> | <b>6E+02</b> |

## Supplementary References

- (1) esri. How IDW works <https://pro.arcgis.com/en/pro-app/tool-reference/3d-analyst/how-idw-works.htm> (accessed Jul 19, 2018).
- (2) Palintest. Digital Arsenic Test Kit <https://www.palintest.com/en/products/digital-arsenic-test-kit> (accessed Jul 19, 2018).
- (3) Ohno, T. Fluorescence Inner-Filtering Correction for Determining the Humification Index of Dissolved Organic Matter. *Environ. Sci. Technol.* **2002**, 36 (4), 742–746.
- (4) Zsolnay, A.; Baigar, E.; Jimenez, M. Differentiating with Fluorescence Spectroscopy the Sources of Dissolved Organic Matter in Soils Subjected to Drying. *Chemosphere* **1999**, 38 (1), 45–50.
